RESEARCH ARTICLE

# The Effects of Traditional Chinese Exercise in Patients with Chronic Obstructive Pulmonary Disease: A Meta-Analysis

Xiaotian Luo<sup>1,2</sup>✉, Jifeng Zhang<sup>3</sup>✉, Rachel Castelberg<sup>4</sup>, Tao Wu<sup>1</sup>, Pengming Yu<sup>1</sup>, Chengqi He<sup>1,2\*\*‡</sup>, Pu Wang<sup>1,2\*\*‡</sup>

**1** Department of Rehabilitation Medicine Center, Sichuan University, West China Hospital, Chengdu, Sichuan, PR China, **2** Department of Key Laboratory of Rehabilitation Medicine in Sichuan, Chengdu, Sichuan, PR China, **3** Department of General surgery Medicine, Datong Second People's Hospital, Datong, Shanxi, PR China, **4** Department of Physical Therapy, University of North Texas Health Science Center, 3500 Camp Bowie Blvd, Fort Worth, United States of America

✉ These authors contributed equally to this work.

‡ These authors also contributed equally to this work.

\* [wangpu0816@qq.com](mailto:wangpu0816@qq.com) (PW); [hxfhcg@163.com](mailto:hxfhcg@163.com) (CQH)

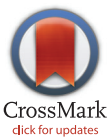

**OPEN ACCESS**

**Citation:** Luo X, Zhang J, Castelberg R, Wu T, Yu P, He C, et al. (2016) The Effects of Traditional Chinese Exercise in Patients with Chronic Obstructive Pulmonary Disease: A Meta-Analysis. PLoS ONE 11 (9): e0161564. doi:10.1371/journal.pone.0161564

**Editor:** Christophe Leroyer, Universite de Bretagne Occidentale, FRANCE

**Received:** January 29, 2016

**Accepted:** August 8, 2016

**Published:** September 2, 2016

**Copyright:** This is an open access article, free of all copyright, and may be freely reproduced, distributed, transmitted, modified, built upon, or otherwise used by anyone for any lawful purpose. The work is made available under the [Creative Commons CC0](https://creativecommons.org/licenses/by/4.0/) public domain dedication.

**Data Availability Statement:** All relevant data are within the paper and its Supporting Information files.

**Funding:** This study is supported by the National Natural Science Foundation of China (grant no. 81401858); author Pu Wang designed the study. This study is also supported by the National Natural Science Foundation of China (grant no.0040205401634); author Chengqi He made the decision to publish.

**Competing Interests:** The authors have declared that no competing interests exist.

## Abstract

### Background

Chronic obstructive pulmonary disease (COPD) is a major public health problem worldwide. However, several studies that have assessed the role of traditional Chinese exercise in the management of this disease include broad variations in sample sizes and results. Therefore, this meta-analysis was conducted to assess the effects of traditional Chinese exercise on patients with COPD.

### Methods

Two investigators independently identified and extracted data from selected articles. A computerized search of electronic databases through August 2015 was conducted. Mean differences (MDs) and 95% confidence intervals (CIs) were calculated to analyze the combined data. The methodological quality was evaluated using the Cochrane risk-of-bias tool. Heterogeneity was assessed with the  $I^2$  test.

### Results

Ten randomized, controlled trials (RCTs) involving 622 patients met the inclusion criteria. There were significant improvements in the 6-minute walking distance test (6 MWD; MWD = 12.10 m; 95% CI, 7.56–16.65 m;  $p < 0.001$ ); forced expiratory volume in one second (FEV1% predicted; WMD = 9.02; 95% CI, 6.80–11.23;  $p < 0.00001$ ); forced expiratory volume in 1 second/forced vital capacity (FEV(1)/FVC) ratio (Tiffenau Index; WMD = 6.67; 95% CI, 5.09–8.24;  $p < 0.00001$ ); and quality of life, as evaluated by the Chronic Respiratory Disease Questionnaire (CRDQ; WMD = 0.85 score; 95% CI, 0.52–1.18;  $p < 0.00001$ ).

## Conclusions

Traditional Chinese exercise could provide an effective alternative method for managing COPD. Larger and higher-quality trials are required.

## Introduction

Chronic obstructive pulmonary disease (COPD) involves airflow limitations that are not fully reversible. It develops progressively and causes serious harm to human health. COPD is currently ranked 12th in global disease incidence rate and 4th in worldwide causes of death [1,2]. In China, COPD, which is one of the most common chronic respiratory diseases, is also a serious threat to people's health. A cross-sectional survey in China showed a COPD prevalence of 8.2% in people >40 years of age [3]. The effects of COPD on physical and emotional health may lead to disability and impaired mood, which in turn influences patients' quality of life. In addition, these physical and psychosocial constraints can increase the need for family and social support.

Traditional Chinese exercise (TCE) is an ancient Chinese system of gentle, self-healing exercise designed to train the functional integrity of and enhance the vitality of the energy called Qi. This vital energy flows through all of the organ systems and tissues of the body via channels called meridians and collaterals. When Qi is rich, free flowing, and in balance, a person usually has good health and longevity. Therefore, traditional Chinese exercise may be a suitable exercise style for patients with COPD, as it provides mild to moderate aerobic activity and strength training of the lower extremities, unsupported upper limbs, and core. It also addresses breathing, respiratory muscle training and stress control, which are important aspects of COPD management. In recent years, the effectiveness of traditional Chinese exercises for rehabilitating stable COPD patients has received increasing recognition and attention. Currently, traditional exercises used by stable COPD patients include Tai Chi, Liu Zijue, Wu Qinxi and Ba Duanjin. Research has shown that these traditional exercises are not only simple but have a positive impact on rehabilitation by improving the stability of lung function, movement endurance and quality of life in patients with COPD [4–6].

However, the sample sizes of individual trials have been small, and the results have been mixed and inconclusive. To date, no systematic reviews with meta-analyses have been performed to specifically examine the effects of traditional Chinese exercises for people with COPD. Using the meta-analysis method, this study undertook a comprehensive quantitative analysis of traditional exercises for patients with stable COPD to provide scientific guidance regarding this treatment method.

## Methods

### Data Sources and Searches

Databases were searched from their inception to August 2015. The search included MEDLINE, EMBASE, CENTRAL, the Cochrane Library, the Chinese BioMedical Literature Database, the China National Knowledge Infrastructure (CNKI), the Chinese Medical Database (CMD), Taiwanese academic online databases, Google Scholar and ClinicalTrials.gov. The following search terms were used: traditional exercise or traditional fitness exercise or traditional exercise therapy or mind-body exercise or Qigong or health Qigong or Tai Chi or Tai Ji or Tai Chi exercise or Taichi Qigong or Liu Zijue or Ba Duanjin or Wu Qinxi or Yi Jinjing and chronic obstructive pulmonary disease or COPD. Two raters performed the data searches (L.X. and Z.J.). Human

subjects and randomized controlled trials (RCTs) were required for inclusion. There was no language restriction. The literature retrieval and the identification of all potentially related articles (including unpublished articles, meta-analyses, and relevant articles from personal contacts who are experts in this field) and international guidelines were performed manually.

## Inclusion Criteria

The inclusion criteria conformed to the PICOS approach, as described below.

**Patients.** According to the Global Initiative for Chronic Obstructive Lung Disease (GOLD) [1] criteria for diagnosing COPD, patients should be in a stable phase of the disease with no acute exacerbations for six months prior to the test.

**Intervention.** The intervention time was longer than 6 weeks. The experimental group only participated in traditional exercises, such as mind-body exercises, Qigong, Tai Chi, Tai Ji, Taichi Qigong, Liu Zijue, Ba Duanjin or Wu Qinxi and Yi Jinjing. The control group received conventional therapy, including drug treatments and routine health guidance.

**Outcome measurements.** From the perspective of rehabilitation, effective interventions should not only reduce impairments, but also improve activity and participation. We focused on used commonly outcome measures reflecting function and activity in people with COPD.

The primary outcomes was to investigate the effect of functional performance:

1. Mobility (e.g. Six-minute walk test,)
2. Lung Function (eg. forced expiratory volume in one second [FEV1% predicted] and forced vital capacity rate in one second [Tiffenau Index])

The secondary outcome was to evaluate the quality of life:

1. Quality of life (eg. dyspnea, emotion, fatigue, and mastery).
2. Adverse events.

**Study design.** RCTs examining rehabilitation treatments that included traditional exercises in stable COPD patients.

## Exclusion criteria

Trial were excluded if they (1) used Qigong and Ba Duanjin involving breathing techniques and meditation but no physical activity; (2) were observational studies, case series, or case reports; or (3) had a score  $\leq 2$  for methodological quality, which we evaluated using the Jadad scale.

## Data Extraction and Analysis

All studies were reviewed, and the data were extracted independently by two raters (X.T.L. and J.F.Z.). Disagreements were resolved by seeking the opinion of a third rater (X.P.L.). For each eligible study, the following information was extracted and recorded: (1) first author's name, (2) publication year, (3) intervention and control group information, (4) intervention duration, (5) sample size, (6) participants' demographic characteristics, and (7) primary and other outcome measurements. The mean changes in outcome measurements compared with baseline were used to assess the differences between the intervention and control groups. Pooled effect sizes and 95% confidence intervals (CIs) were calculated using Cochrane Collaboration software (Review Manager [RevMan], version 5.3 for Windows, downloaded from <http://ims.cochrane.org/revman/download>). Mean differences (MDs) were used for continuous data. The  $\chi^2$  test and the Higgins  $I^2$  test were used to assess heterogeneity.

## Quality and Risk of Bias Assessments

The Jadad scale was used to assess the methodological quality of each study [7]. A score  $\leq 2$  indicates low quality, and a score  $\geq 3$  indicates high quality [8]. The Cochrane Handbook for Systematic Reviews of Interventions (RevMan version 5.3, the Cochrane Collaboration, 2011) was used to evaluate the risk of bias. Two authors (L.X. and Z.J.) subjectively reviewed all articles and assigned a value of 'high', 'low', or 'unclear' based on the following: (a) selection bias (whether there was adequate generation of the randomization sequence and whether the allocation concealment was satisfactory); (b) blinding (i.e., performance bias and detection bias, including whether there was blinding of the participants, personnel, and outcome assessments); (c) attrition bias (whether incomplete outcome data were sufficiently assessed and addressed); (d) reporting bias (whether there was evidence of selective outcome reporting); and (e) other biases (whether the study was free of other problems that could increase the risk of bias). Any disagreements were resolved by discussion and consensus. To improve accuracy, a third investigator (X.P.L.) was consulted when any disagreement emerged. Any analytical data missing from the primary reports were requested from the authors. When the same study was reported in multiple publications, we used the most recent study to avoid duplicating information.

## Statistical Analysis

RevMan software, version 5.3, was used to analyze the data from the included studies. For continuous outcomes, MDs were used to calculate the difference between means; 95% confidence intervals (CIs) were treated as an effective indicator when all measurements were estimated from each study; and fixed effects and random effects models were used to pool data across studies [9]. As a quantitative measurement of inconsistency across studies, heterogeneity was tested using the  $I^2$  statistic. Studies with an  $I^2$  statistic of 25% to 50% were considered to have low heterogeneity, those with an  $I^2$  statistic of 50% to 75% were considered to have moderate heterogeneity, and those with an  $I^2$  statistic  $>75\%$  were considered to have high heterogeneity [10]. When the  $I^2$  statistic was  $>50\%$ , sensitivity and subgroup analyses were performed to identify the potential sources of heterogeneity. Pre-specified sensitivity analyses were performed by removing one study at a time and determining the influence of a single article on the overall pooled estimate. The potential publication bias for each analysis was assessed using a funnel plot. When the number of articles included in one analysis was limited (less than 10), publication bias was not assessed. Statistical significance was indicated by a P value  $<0.05$ . This study applied an intention-to-treat (ITT) analysis and followed the Preferred Reporting Items for Systematic Reviews and Meta-Analyses (PRISMA) statement [11].

## Results

### Literature Search Results

Through database searches, 232 potentially relevant articles were identified. Forty-eight duplicates were removed, and 169 reviews and unrelated articles were excluded based on the titles and summaries. Finally, based on the full texts of the remaining 15 articles, 10 (nine published in English and one published in Chinese) met the inclusion criteria, and 8 of those were included in the meta-analysis (Fig 1).

### Trial Characteristics

Ten RCTs [12–20] were selected for this meta-analysis. Nine [4,13–19] were published in English, and one was published in Chinese [12]. Three RCTs that enrolled the same population or involved the same trials were pooled in our meta-analysis and data from these three articles

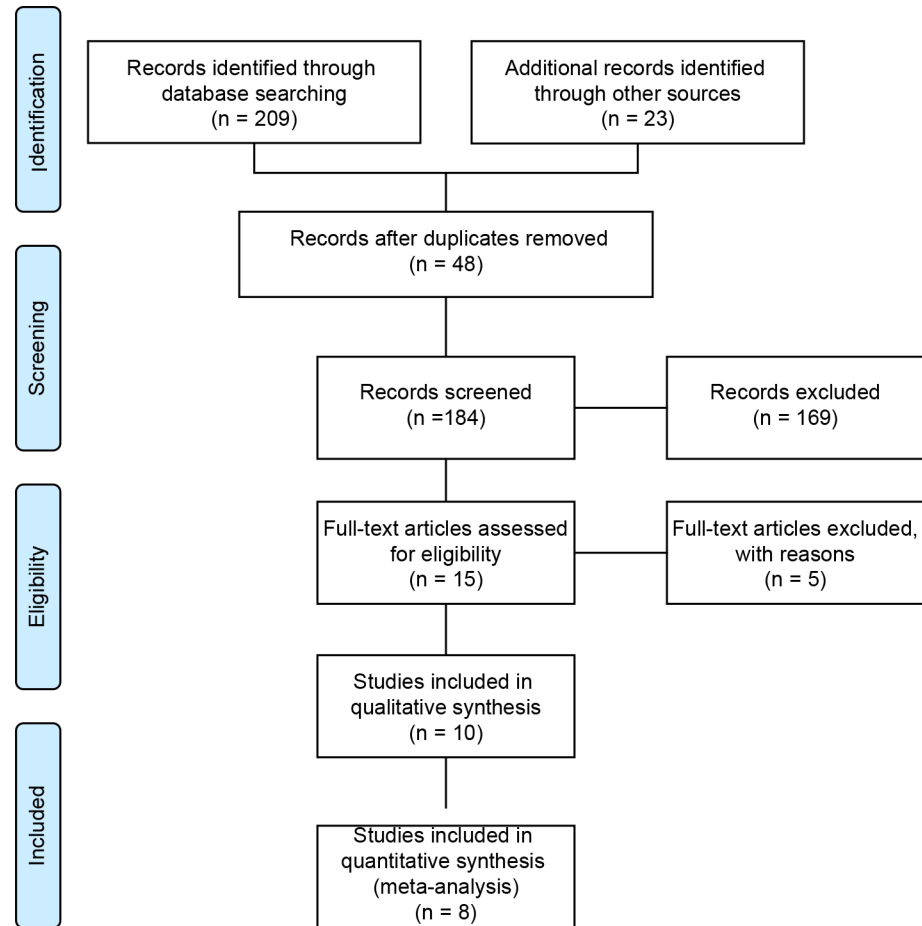

**Fig 1. Search strategy and flow chart of the screened, excluded and analyzed articles.**

doi:10.1371/journal.pone.0161564.g001

were combined because some important outcomes were included separately in the three RCTs [18–20]. In addition, two ongoing RCTs included protocol information for the same population [4,14] and were combined. The studies were published between 2010 and 2014. The sample size ranged from 5 to 206 (total, 622). Five RCTs reported results from the 6 MWD [12,13,15,16,18]. Quality of life was evaluated with the CRDQ in three RCTs [13–15]. Three RCTs [12,16,17] reported FEV1, and three [12,15,17] reported FVC. Follow-up periods ranged from 6 to 48 weeks, and the exercise time lasted from 30 to 60 min. The type of intervention was Tai Chi or Qigong in 5 RCTs [12,14,15,16,17], short-form sun style in 1 RCT [4], Ba Duan-jin in 1 RCT [13], and 13 movements of Breathing Regulating Tai Chi Qigong (13BRTCQ) in 3 RCTs [18,19,20]. The interventions provided for the control or comparison groups in all included trials were education, breathing techniques, and walking with or without breathing techniques. The patients in all trials received the standard pharmacological treatment in addition to the experimental intervention. The characteristics of the included trials are listed in Table 1.

### Methodological Quality

Two investigators (L.X.T. and Z.J.F.) agreed on the Jadad score for each study. The mean Jadad score of the included studies was greater than 3. All but two of the RCTs [14,16] described the

**Table 1. Characteristics of the randomized controlled trials included in the meta-analysis.**

| Study [ref]                  | Study design | Jadad score | Patient no. (M/F) | Age, mean (I/C) | FEV1 (% of predicted)                                        | Study group (n)                      | TC form or style     | Protocol                                 | Adherence/adverse effects | Outcomes                                                                          |
|------------------------------|--------------|-------------|-------------------|-----------------|--------------------------------------------------------------|--------------------------------------|----------------------|------------------------------------------|---------------------------|-----------------------------------------------------------------------------------|
| Du 2013 [12]                 | RCT          | 3           | 112 (70/42)       | 65.24/64.48     | TC (73.36±6.33), exercise (74.28±7.39), control (72.97±6.46) | TC (36), exercise (38), control (38) | 24-short form TC     | 12 weeks * 2 times/day, 30 min/per time  | 100%/none                 | FEV1, FEV1/FVC (%), MVV (L/min), SaO <sub>2</sub> (%), 6 MWD (m), CAT             |
| Lorna 2014 [4]               | RCT          | 4           | 42 (22/20)        | 63.1/62.0       | TC (102±23), control (102±22)                                | TC (21), control (21)                | Short-form sun style | 12 weeks * 1 time/day, 50 min/per time   | 100%/none                 | ISWT, ESWT, MPPB, HRQoL, HADS, FPI                                                |
| Bobby 2011 [13]              | RCT          | 4           | 80 (71/9)         | 71.7/73.1       | TC (37.13±2.22), control (36.75±2.11)                        | TC (40), control (40)                | Ba Duanjin           | 24 weeks * 4 times/week, 45 min/per time | 67%/none                  | 6 MWD, HRQoL                                                                      |
| Regina 2013 [14]             | RCT          | 4           | 42 (23/19)        | 73/75           | TC (59±16), control (63±14)                                  | TC (22), control (20)                | TC                   | 12 weeks * 2 times/day, 60 min/per time  | 86%/none                  | ISWT, ESWT, MPPB, HRQoL, VO <sub>2</sub> , VCO <sub>2</sub>                       |
| Gloria 2010 [15]             | RCT          | 3           | 10 (6/4)          | 65/66           | TC (53±7), control (47±7)                                    | TC (5), control (5)                  | TC                   | 12 weeks * 2 times/day, 60 min/per time  | 100%/none                 | 6 MWT, UGT, HRQoL                                                                 |
| Niu 2014 [16]                | RCT          | 5           | 40 (37/3)         | 61.3/59.7       | TC (41.9±5.50), control (43.7±5.16)                          | TC (20), control (20)                | TC                   | 24 weeks * 7 times/week, 50 min/per time | 95%/none                  | 6 MWD, FEV1, FEV1% pre, TwPes                                                     |
| Liu 2012 [17]                | RCT          | 3           | 132 (91/41)       | 61.82/62.2      | HQG (74.43±12.93), PR (75.31±12.84), control (75.31±13.79)   | HQG (51), PR (32), control (35)      | Qigong               | 24 weeks * 3 times/week, 60 min/per time | 89%/none                  | 6 MWD, HRQoL                                                                      |
| Chan 2010 [19], 2013 [18,20] | RCT          | 5           | 206 (188/18)      | 71.7/73.6       | TC (50.1±21.8), exercise (56.4±25.6), control (55.1±23.3)    | TC (70), exercise (69), control (67) | 13BRTCQ              | 12 weeks * 2 times/week, 60 min/per time | 86%/none                  | 6 MWD, dyspnea, fatigue, HRQoL, MSPSS-c, FVC, FEV1, BORG, SCALE, SaO <sub>2</sub> |

Legend: RCT, randomized controlled trial; M/F, male/female; TC, Tai Chi; I/C, intervention/control; FEV1, forced expiratory volume in one second; FVC, forced vital capacity; TCQ, Tai Chi Qigong; Ba Duanjin, eight-length brocade exercise; 6 MWD, 6-minute walking distance; HRQoL, health-related quality of life; CAT, COPD assessment test; ESWT, endurance shuttle walk test; FPI, functional performance inventory; HADS, Hospital Anxiety and Depression Scale; ISWT, incremental shuttle walk test; MPPB, modified physical performance battery test; VCO<sub>2</sub>, carbon dioxide production; VO<sub>2</sub>, oxygen consumption; TwPes: twitch esophageal pressure. There were no significant differences in the FEV1 (% of predicted) among groups at baseline according to the data reported in each article; 13BRTCQ, 13 movements of Breathing Regulating TCQ.

doi:10.1371/journal.pone.0161564.t001

methods of randomization, but only five [4,13–15] reported allocation concealment details. Five trials [4,14–17] mentioned the blinding of assessors for data collection. All of the articles reported complete outcome data. The risk-of-bias analysis is shown in Fig 2.

## Outcomes

**6 MWD.** Five of the 10 trials [12,13,15,16,18] (n = 314 patients) compared the distance walked during the 6 MWD for the Tai Chi or Qigong, Ba Duanjin and control groups. An unsuccessful attempt was made to contact the authors via e-mail to obtain the applicable data. Two trials [12,15] reported an improvement in the 6 MWD after 3 months of Tai Chi, Qigong, or Ba Duanjin compared with the control group. The other three trials [13,16,18] reported outcomes after 6 months of Tai Chi or Qigong. The five trials showed heterogeneity when they were pooled in a meta-analysis (P = 0.01, I<sup>2</sup> = 69%). The five articles were read again in full,

**A**

|  | Regina 2013 | Niu 2014 | Liu 2012 | Leung 2010 | Gloria 2010 | Du 2013 | Chan 2013 | Bobby 2011 |                                                           |
|--|-------------|----------|----------|------------|-------------|---------|-----------|------------|-----------------------------------------------------------|
|  | ?           | ?        | +        | +          | +           | +       | +         | +          | Random sequence generation (selection bias)               |
|  | +           | +        | ?        | +          | +           | ?       | ?         | +          | Allocation concealment (selection bias)                   |
|  | +           | +        | -        | ?          | -           | -       | -         | +          | Blinding of participants and personnel (performance bias) |
|  | +           | +        | +        | +          | +           | ?       | ?         | ?          | Blinding of outcome assessment (detection bias)           |
|  | +           | +        | +        | +          | +           | +       | +         | +          | Incomplete outcome data (attrition bias)                  |
|  | +           | +        | +        | +          | +           | +       | +         | +          | Selective reporting (reporting bias)                      |
|  | ?           | +        | ?        | ?          | +           | +       | +         | +          | Other bias                                                |

**B**

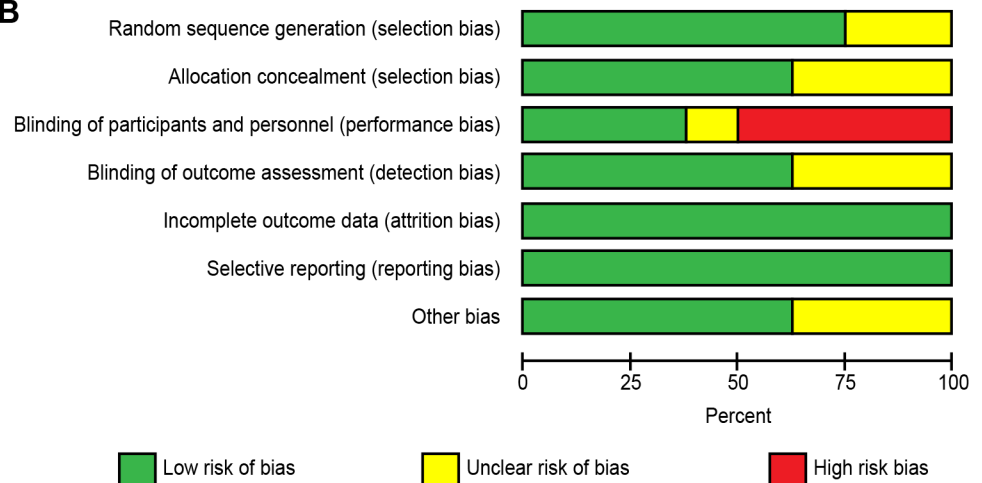

**Fig 2. Risk-of-bias analysis.** (A) Risk-of-bias summary: The authors' judgments regarding each risk-of-bias item for each included study. (B) Risk-of-bias graph: The authors' judgments regarding each risk-of-bias item presented as percentages across all included studies.

doi:10.1371/journal.pone.0161564.g002

and their data collection processes were checked to confirm that there were no errors. The subgroup and sensitivity analyses of the data from the five trials showed that there was a difference in race. The Asian and European subgroups showed homogeneity, and the results are shown in Table 2. A random effects meta-analysis was performed to incorporate the heterogeneity among these five studies. A pooled effect size of five trials [12,13,15,16,18] showed that the TCE intervention was associated with a statistical improvement on the 6 MWD and could increase the length of the 6 MWD compared with the control intervention (MD, 12.10 m; 95% CI, 7.56–16.65 m; P<0.001; Fig 3).

**FEV1 percentages predicted in Lung Function.** Three of the 10 trials [12,16,17] (n = 199 patients) compared the FEV1 percentages predicted in the TCE intervention and control groups. One [16] of those articles could not be pooled directly in the meta-analysis because it did not provide data in the correct format. One trial [12] reported an improvement in the

**Table 2. Sensitivity analyses of the 6 MWD and Tiffenau index, excluding low-quality trials.**

| Outcome                           | n (N)   | MD (95% CI)         | P value   | I <sup>2</sup> (%) | P <sub>heterogeneity</sub> |
|-----------------------------------|---------|---------------------|-----------|--------------------|----------------------------|
| <b>6 MWD</b>                      |         |                     |           |                    |                            |
| All included trials [12,13,15,16] | 342 (4) | 12.10 [7.56, 16.65] | P<0.001   | 69%                | P = 0.01                   |
| High-quality trials [13,16,18]    | 258 (3) | 43.65 [23.94,63.37] | P<0.0001  | 25%                | P = 0.26                   |
| Low-quality trials [12,15]        | 84 (2)  | 10.33 [5.66, 15.00] | P<0.0001  | 0                  | P = 0.9                    |
| <b>FEV1/FVC</b>                   |         |                     |           |                    |                            |
| All included trials [12,15,17]    | 170 (3) | 4.85 [3.51,6.18]    | P<0.00001 | 89%                | P<0.00001                  |
| High-quality trials [12,15]       | 84 (2)  | 6.67 [5.09,8.24]    | P<0.00001 | 0                  | P = 0.75                   |
| Low-quality trials [17]           | 86 (1)  | 0.08 [-2.47,2.63]   | P = 0.95  | –                  | –                          |

Legend: 6 MWD, 6-minute walking distance; Tiffenau Index, forced expiratory volume in 1 second/forced vital capacity (FEV(1)/FVC) ratio; n, number of patients, N, number of trials.

doi:10.1371/journal.pone.0161564.t002

FEV1 percentage predicted after 3 months of Tai Chi or Qigong compared with the control intervention, and two other trials [16,17] reported the outcome after 6 months of Tai Chi or Qigong. These three trials showed homogeneity when they were pooled in a meta-analysis (P = 0.22, I<sup>2</sup> = 34%). Therefore, the fixed effects meta-analysis was used to analyze the three studies. The pooled effect size of these three trials [12,16,17] showed that the TCE intervention was associated with a statistically significant improvement in the FEV1 percentage predicted and could increase COPD patients' lung function, as measured by the FEV1 percentage predicted, compared with the control group (MD, 9.02; 95% CI, 6.80–11.23; P<0.00001; Fig 4).

**Tiffenau Index of Lung Function.** Three of the 10 trials [12,15,17] (n = 169 patients) compared the FEV1 percentage predicted between the TCE intervention and control groups. One [15] of those articles could not be pooled directly in the meta-analysis because it did not provide the data in the correct format. One trial [12] reported that there was an improvement in the Tiffenau Index after 3 months of Tai Chi or Qigong compared with the control intervention, and the other two trials [15,17] reported the outcomes after 6 months of Tai Chi or Qigong. The three trials showed heterogeneity when they were pooled in a meta-analysis

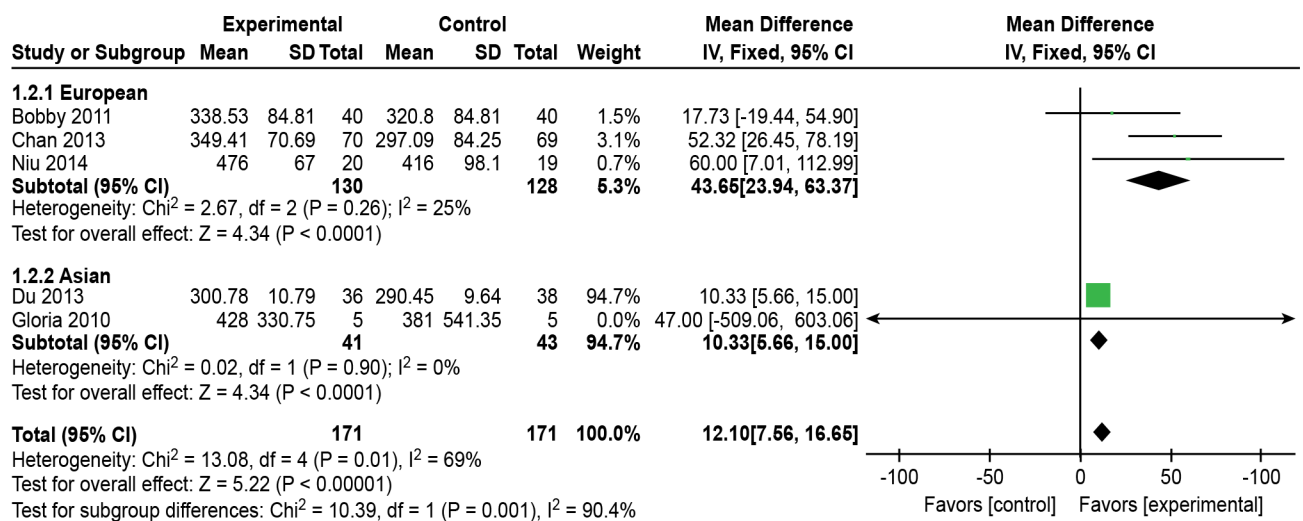

**Fig 3. Effects of traditional Chinese exercise on 6-minute walking distance.** The subgroup meta-analysis of RCTs evaluating the effects of traditional Chinese exercise on the 6 MWD using a fixed effects model.

doi:10.1371/journal.pone.0161564.g003



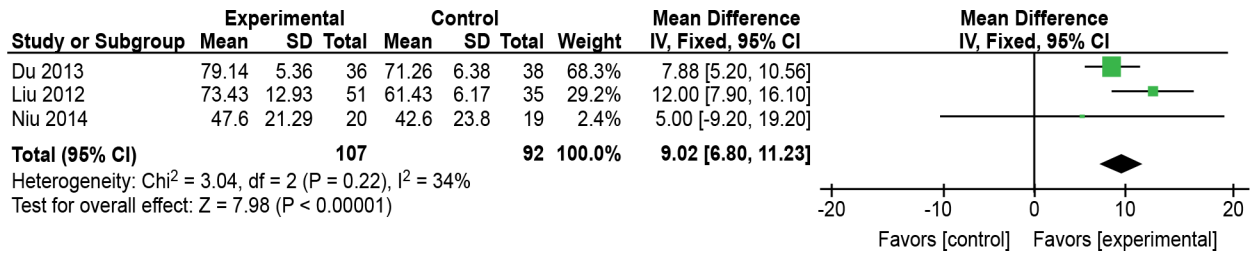

**Fig 4. Effects of traditional Chinese exercise on forced expiratory volume in one second.** Meta-analysis of RCTs evaluating the effects of traditional Chinese exercise on FEV1 using a fixed effects model.

doi:10.1371/journal.pone.0161564.g004

( $P < 0.0001$ ,  $I^2 = 89\%$ ). A sensitivity analysis was performed to explain the heterogeneity (Table 2). The Tiffenau Index effect size of one trial [15] was obviously greater than that of the other two trials, and those two trials showed homogeneity ( $P = 0.75$ ,  $I^2 = 0\%$ ) when the trial with the larger effect size was removed. Therefore, the fixed effects meta-analysis was used to analyze the two studies. The pooled effect size of the two trials [12,15] showed that the TCE intervention was associated with a statistically significant improvement in the Tiffenau Index and could increase COPD patients' lung function compared with the control intervention (MD, 6.67; 95% CI, 5.09–8.24;  $P < 0.00001$ ; Fig 5).

**Quality of life.** Three of the 10 trials [4,13,14] ( $n = 128$  patients) compared quality of life between the TCE intervention and control groups. One [4,13,14] of those articles could not be pooled directly in the meta-analysis because it did not provide data in the correct format. An unsuccessful attempt was made to contact the authors via e-mail to obtain the applicable data. Two trials [13,14] reported an improvement in quality of life after 3 months of Tai Chi or Qigong compared with the control intervention, and the other trial [4] reported the outcome after 6 months of Tai Chi or Qigong. The three trials showed homogeneity when they were pooled in a meta-analysis ( $P = 0.99$ ,  $I^2 = 0\%$ ). Subgroup analyses of the three trials' data were performed using a fixed effects meta-analysis. The total pooled effect size of the three trials [4,13,14] showed that the TCE intervention was associated with a statistically significant improvement in quality of life compared with the control intervention (MD, 0.85 score; 95% CI, 0.52–1.18;  $p < 0.00001$ ; Fig 6).

**Dyspnea.** The three trials showed homogeneity when they were pooled in a meta-analysis ( $P = 0.67$ ,  $I^2 = 0\%$ ). A fixed effects meta-analysis was performed. The pooled effect size of the three trials [4,13,14] showed that the TCE intervention was associated with a statistically significant improvement in dyspnea in terms of quality of life and could decrease dyspnea in COPD patients compared with the control intervention (MD, 0.63 score; 95% CI, 0.01–1.24;  $P = 0.05$ ; Fig 6).

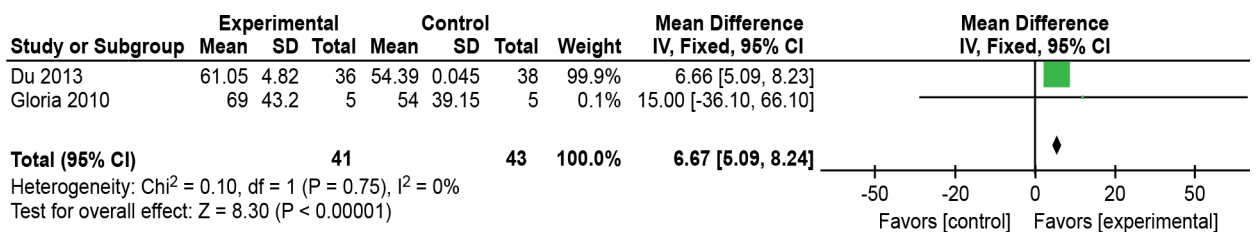

**Fig 5. Effects of traditional Chinese exercise on the forced vital capacity rate in one second.** A meta-analysis of RCTs evaluating the effects of traditional Chinese exercise on the Tiffenau Index using the fixed effects model.

doi:10.1371/journal.pone.0161564.g005

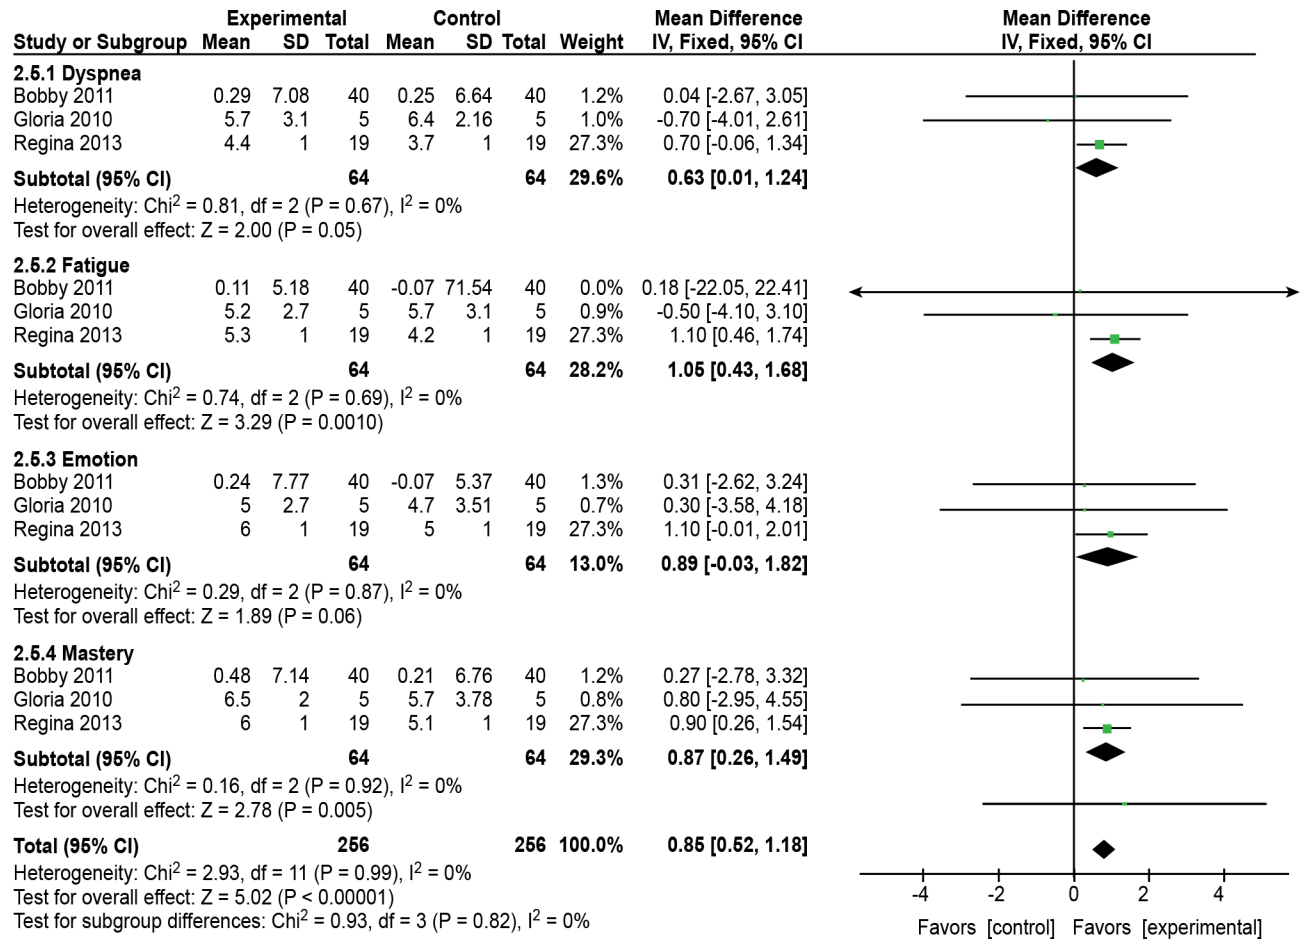

**Fig 6. Effects of traditional Chinese exercise on health-related quality of life. A meta-analysis of RCTs evaluating the effects of traditional Chinese exercise on health-related quality of life using a fixed effects model.**

doi:10.1371/journal.pone.0161564.g006

**Fatigue.** The three trials showed homogeneity when they were pooled in a fixed-effects meta-analysis ( $P = 0.69$ ,  $I^2 = 0\%$ ). The pooled effect size of the three trials [4,13,14] showed that the TCE intervention was associated with a statistically significant improvement in fatigue in terms of quality of life and could decrease fatigue in COPD patients compared with the control intervention (MD, 1.05 score; 95% CI, 0.43–1.68;  $P = 0.0001$ ; Fig 6).

**Emotion.** The three trials showed homogeneity when they were pooled in a fixed-effects meta-analysis ( $P = 0.87$ ,  $I^2 = 0\%$ ). The pooled effect size of the three trials [4,13,14] showed that the TCE intervention was not associated with a statistically significant improvement in emotion in terms of quality of life and did not improve the emotion of COPD patients compared with the control intervention (MD, 0.89; 95% CI, -0.03–1.82;  $P = 0.06$ ; Fig 6).

**Mastery.** The three trials showed homogeneity when they were pooled in a fixed-effects meta-analysis ( $P = 0.92$ ,  $I^2 = 0\%$ ). The pooled effect size of the three trials [4,13,14] showed that the TCE intervention was associated with a statistically significant improvement in mastery in terms of quality of life and could increase the mastery of COPD patients compared with the control group (MD, 0.87 score; 95% CI, 0.26–1.49;  $P = 0.005$ ; Fig 6).

## Discussion

We performed a meta-analysis to assess the effects of traditional Chinese exercise included Tai-chi, Qigong, Liu Zijue, Ba Duanjin, Wu Qinxi, Yi Jinjing on patients with COPD. This is different from those articles [21–27] that searched the effectiveness of T'ai Chi and/or Qigong. We found that traditional exercises had rehabilitative effects on the 6 MWD, FEV1, Tiffenau Index, and CRDQ score compared with conventional treatment in stable COPD patients.

Decreased exercise tolerance is the one of main characteristics of COPD patients for several reasons. In COPD patients, an exercise endurance evaluation can increase understanding of the patient's functional status, quality of life, and prognosis. Common clinical exercise endurance tests include the 6 MWD and incremental shuttle walk test (ISWT). In our study, we found that traditional Chinese exercise could increase the length of the 6 MWD compared with control conditions, but mean changes of 6 MWD were lower than the its minimum clinically important difference(MCID) ( $\geq 26$  m) [28]. This result is consistent with some published studies. In healthy people, traditional Chinese exercise movements increase lower limb muscle strength [29–32], enhance knee and ankle proprioception [33], reduce station of body sway [34] and improve the speed of response to postural disturbances [35], which may reduce the risk of falls. A possible explanation for this might be that these styles of exercise training may increase the balance and coordination of COPD patients and reduce the patient's concerns about falling. This may improve the patient's ability to move despite airflow obstruction, pulmonary over-inflation, and gas exchange impairment in the process of respiratory movement, which otherwise limit patients' exercise capacity so severely that they are unable to perform rehabilitative exercises, which leads to an overall decrease in exercise ability [36]. These five trials showed heterogeneity when they were pooled in a meta-analysis, however, the subgroup and sensitivity analyses showed homogeneity between the Asian and European subgroups that may be related to differences in race. In these papers [21.22.24.25], there was no subgroup analysis of 6MWD about different ethnic groups.

Patients with COPD experience a decrease in exercise capacity and increased dyspnea, which is directly related to the damage to lung function. The most commonly used clinical indices of lung function are VC, FEV1, FEV1% predicted, the Tiffenau Index, MVV, FEV1% and the Tiffenau Index predicted value (%). These indices are important indicators of the degree of airway obstruction and can be used to assess the symptom and disease severity in these patients [37]. So we choose the two indexes of pulmonary function to analyze the effectiveness of traditional Chinese exercise therapy which was different from the article [26]. Through a comprehensive observation of the FEV1 and Tiffenau Index indicators of pulmonary function, our meta-analysis results indicated that traditional Chinese exercises are superior to conventional therapy in a stable phase of patients with COPD. Meantime, in this article [27], it is also shown that Tai Chi can improve lung function for Patients with asthma and chronic obstructive pulmonary disease. Our findings support the findings of previous studies that investigated traditional Chinese exercises as an intervention for chronic cardiovascular diseases [38], cardiorespiratory fitness [39], and musculoskeletal diseases [40]. The reason for these positive effects may be that traditional Chinese exercise requires close coordination of breathing and movement, with the diaphragm lifting through slow, deep abdominal breathing; to achieve this coordination, consciously guided respiration is often used during the movements. This process significantly increases chest expansion and retraction, which leads to increased alveolar ventilation.

Decreases in daily life activities can cause harm to the body and mind and diminish the patient's quality of life. The most widely used method for the clinical assessment of quality of life of COPD patients is the CRDQ. This questionnaire not only reflects the patient's condition

but also evaluates his or her psychological status, social activities, and daily life. Worldwide, there is good correlation between lung function and clinical symptoms, and race is not an influential factor. Subgroup analyses of dyspnea, fatigue, emotion and mastery in our study suggest that TCE resulted in improved quality of life compared with the control condition. Some research has demonstrated that TCE might improve quality of life in patients with other chronic diseases, such as heart failure, post-stroke impairments, and cancer [41–42]. Other studies have shown that outpatient pulmonary rehabilitation programs improve functional capacity and health-related quality of life [43–46]. Community-based respiratory rehabilitation and physical exercises also improve exercise tolerance and health-related quality of life [47]. We speculate that this effect may be related to social support, which may contribute to a sense of acceptance, and that TCE as a type of positive social interactions could offer companionship and friendly support. This, in turn, affects whole-body functioning and prevents unhealthy physiological behavioral responses, such as poor treatment adherence and social withdrawal, in patients with COPD. TCE was associated with improvements in exercise capacity, physical performance and quality of life of patients with COPD; thus, it offers an alternative form of therapy that does not require exercise equipment or a specific training venue. Therefore, it is possible to make effective exercise training more easily accessible for a large numbers of people with COPD, especially those with transportation problems or those living in remote and rural areas.

Rare adverse events were found in the studies included in our meta-analysis. The effects were mild and disappeared spontaneously after the first few sessions of training. In summary, traditional Chinese exercises seem to be well tolerated by patients with COPD.

Although we were different with article [22] which have included the articles only published in the English language, we excluded the low quality of the literature are all Chinese literatures. We believed that if they were included in the meta-analysis, may overestimate the results of the study and affect the effectiveness of the results which is different from several other articles [21–27]. Meantime, the low quality of the literature may have affected the evidence grades and clinical recommendations as mentioned in article [24]. Therefore, we only included literature with a high methodological quality, which may have made the results more conservative, robust and given them greater value as a clinical reference.

When meta-analyses are restricted to observational studies rather than experimental research, the results can be influenced by bias and confounding factors. Therefore, this study might have limitations in the following five areas. (1) The descriptions of the 10 studies regarding the randomization method, allocation concealment, blinding evaluation, loss outcomes and other aspects were not detailed and comprehensive; therefore, these included studies might exhibit moderate selection, implementation and measurement biases. (2) Because of the small number of included studies, it is impossible to further stratify the analysis according to age, gender, disease, intervention time, and intervention movement. (3) The intervention and follow-up times were not the same across all studies, which might also have influenced the authenticity of the pooled results. (4) The samples included in the study were not large, and we lacked large-scale RCTs, which might have affected the objectivity and reliability of the evaluation system. (5) Most of the studies lacked other objective outcome measurements, such as exacerbation rate, peripheral muscle strength, balance, survival and immune function, particularly at the molecular level.

## Conclusions

This meta-analysis of 10 RCTs showed that traditional Chinese exercises had rehabilitative effects on lung function, exercise tolerance and quality of life compared with conventional treatment in stable COPD patients.

## Supporting Information

**S1 Appendix. PRISMA 2009 checklist.**  
(DOC)

**S2 Appendix. Reasons for excluded articles.**  
(ZIP)

## Author Contributions

**Conceived and designed the experiments:** CQH PW XTL.

**Performed the experiments:** XTL JFZ TW.

**Analyzed the data:** XTL JFZ PMY.

**Contributed reagents/materials/analysis tools:** CQH PW TW.

**Wrote the paper:** XTL RC.

## References

1. Vestbo J, Hurd SS, Agustí AG, Jones PW, Vogelmeier C, Anzueto A, et al. Global strategy for the diagnosis, management, and prevention of chronic obstructive pulmonary disease: gold executive summary. *Am J Respir Crit Care Med.* 2013; 187: 347–365. doi: [10.1164/rccm.201204-0596PP](https://doi.org/10.1164/rccm.201204-0596PP) PMID: [22878278](https://pubmed.ncbi.nlm.nih.gov/22878278/)
2. Chapman KR, Mannino DM, Soriano JB, Vermeire PA, Buist AS, Thun MJ. Epidemiology and costs of chronic obstructive pulmonary disease. *Eur Respir J.* 2006; 27: 188–207. doi: [10.1183/09031936.06.00024505](https://doi.org/10.1183/09031936.06.00024505) PMID: [16387952](https://pubmed.ncbi.nlm.nih.gov/16387952/)
3. The Chinese Medical Association Respiratory Neurology, Chronic Obstructive Pulmonary Disease Committee. Chronic obstructive pulmonary disease diagnosis and treatment guidelines (revised in 2013). *Chin Tuberc Respir J.* 2013; 36: 255–264.
4. Ng L, Chiang LK, Tang R, Siu C, Fung L, Lee A, et al. Effectiveness of incorporating Tai Chi in a pulmonary rehabilitation program for chronic obstructive pulmonary disease in primary care: a pilot randomized controlled trial. *Eur J Integr Med.* 2014; 6: 248–258. doi: [10.1019/j.eujim.2014.01.007](https://doi.org/10.1019/j.eujim.2014.01.007)
5. Ng BH, Tsang HW, Jones AY, So CT, Mok TY. Functional and psychosocial effects of health qigong in patients with COPD: a randomized controlled trial. *J Altern Complement Med.* 2011; 17: 243–251. doi: [10.1089/acm.2010.0215](https://doi.org/10.1089/acm.2010.0215) PMID: [21417809](https://pubmed.ncbi.nlm.nih.gov/21417809/)
6. Spruit MA, Polkey MI. T'ai chi for individuals with COPD: an ancient wisdom for a 21st century disease? *Eur Respir J.* 2013; 41: 1005–1007. doi: [10.1183/09031936.00128512](https://doi.org/10.1183/09031936.00128512) PMID: [23633607](https://pubmed.ncbi.nlm.nih.gov/23633607/)
7. Jadad AR, Moore RA, Carroll D, Jenkinson C, Reynolds DJ, Gavaghan DJ, et al. Assessing the quality of reports of randomized clinical trials: is blinding necessary? *Control Clin Trials.* 1996; 17: 1–12. doi: [10.1016/0197-2456\(95\)00134-4](https://doi.org/10.1016/0197-2456(95)00134-4) PMID: [8721797](https://pubmed.ncbi.nlm.nih.gov/8721797/)
8. Kjaergard LL, Villumsen J, Gluud C. Reported methodologic quality and discrepancies between large and small randomized trials in meta-analyses. *Ann Intern Med.* 2001; 135: 982–989. doi: [10.7326/0003-4819-135-11-200112040-00010](https://doi.org/10.7326/0003-4819-135-11-200112040-00010) PMID: [11730399](https://pubmed.ncbi.nlm.nih.gov/11730399/)
9. DerSimonian R, Laird N. Meta-analysis in clinical trials. *Control Clin Trials.* 1986; 7: 177–188. doi: [10.1016/0197-2456\(86\)90046-2](https://doi.org/10.1016/0197-2456(86)90046-2) PMID: [3802833](https://pubmed.ncbi.nlm.nih.gov/3802833/)
10. Higgins JPT, Thompson SG, Deeks JJ, Altman DG. Measuring inconsistency in meta-analyses. *BMJ.* 2003; 327: 557–560. doi: [10.1136/bmj.327.7414.557](https://doi.org/10.1136/bmj.327.7414.557) PMID: [12958120](https://pubmed.ncbi.nlm.nih.gov/12958120/)
11. Liberati A, Altman DG, Tetzlaff J, Mulrow C, Gøtzsche PC, Ioannidis JP, et al. The PRISMA statement for reporting systematic reviews and meta-analyses of studies that evaluate healthcare interventions: explanation and elaboration. *BMJ.* 2009; 339: b2700. doi: [10.1136/bmj.b2700](https://doi.org/10.1136/bmj.b2700) PMID: [19622552](https://pubmed.ncbi.nlm.nih.gov/19622552/)
12. Du S, Ding L, Wang C, Yang F, Xing B, et al. The effect of Taijiquan exercise in lung function and exercise endurance on patients with chronic obstructive pulmonary disease. *Chinese Journal Rehabilitation Medicine.* 2013; 28: 374–376.
13. Ng BH, Tsang HW, Jones AY, So CT, Mok TY. Functional and psychosocial effects of health qigong in patients with COPD: a randomized controlled trial. *J Altern Complement Med.* 2011; 17: 243–251. doi: [10.1089/acm.2010.0215](https://doi.org/10.1089/acm.2010.0215) PMID: [21417809](https://pubmed.ncbi.nlm.nih.gov/21417809/)

14. Leung RW, McKeough ZJ, Peters MJ, Alison JA. Short-form Sun-style t'ai chi as an exercise training modality in people with COPD. *Eur Respir J*. 2013; 41: 1051–1057. doi: [10.1183/09031936.00036912](https://doi.org/10.1183/09031936.00036912) PMID: [22878879](https://pubmed.ncbi.nlm.nih.gov/22878879/)
15. Yeh GY, Roberts DH, Wayne PM, Davis RB, Quilty MT, Phillips RS. Tai Chi exercise for patients with chronic obstructive pulmonary disease: a pilot study. *Respir Care*. 2010; 55: 1475–1481. PMID: [20979675](https://pubmed.ncbi.nlm.nih.gov/20979675/)
16. Niu R, He R, Luo BL, Hu C. The effect of tai chi on chronic obstructive pulmonary disease: a pilot randomised study of lung function, exercise capacity and diaphragm strength. *Heart Lung Circ*. 2014; 23: 347–352. doi: [10.1016/j.hlc.2013.10.057](https://doi.org/10.1016/j.hlc.2013.10.057) PMID: [24210727](https://pubmed.ncbi.nlm.nih.gov/24210727/)
17. Liu X, Jin H, Ng BH, Gu Y, Wu Y, Lu G. Therapeutic effects of qigong in patients with COPD: a randomized controlled trial. *HK J Occup Ther*. 2012; 22: 38–46. doi: [10.1016/j.hkjot.2012.06.002](https://doi.org/10.1016/j.hkjot.2012.06.002)
18. Chan AW, Lee A, Lee DT, Suen LK, Tam WW, Chair SY, et al. The sustaining effects of Tai chi Qigong on physiological health for COPD patients: a randomized controlled trial. *Complement Ther Med*. 2013; 21: 585–594. doi: [10.1016/j.ctim.2013.09.008](https://doi.org/10.1016/j.ctim.2013.09.008) PMID: [24280465](https://pubmed.ncbi.nlm.nih.gov/24280465/)
19. Chan AWK, Lee A, Suen LKP, Tam WWS. Tai chi Qigong improves lung functions and activity tolerance in COPD clients: a single blind, randomized controlled trial. *Complement Ther Med*. 2011; 19: 3–11. doi: [10.1016/j.ctim.2010.12.007](https://doi.org/10.1016/j.ctim.2010.12.007) PMID: [21296261](https://pubmed.ncbi.nlm.nih.gov/21296261/)
20. Chan AW, Lee A, Lee DT, Sit JW. Evaluation of the sustaining effects of Tai Chi qigong in the sixth month in promoting psychosocial health in COPD patients: a single-blind, randomized controlled trial. *Scientific World J*. 2013; 9: 1–11. doi: [10.1155/2013/425082](https://doi.org/10.1155/2013/425082)
21. Guo JB, Chen BL, Lu YM, Zhang WY, Zhu ZJ, Yang YJ, et al. Tai Chi for improving cardiopulmonary function and quality of life in patients with chronic obstructive pulmonary disease: a systematic review and meta-analysis. *Clin Rehabil*. 2015. doi: [10.1177/0269215515604903](https://doi.org/10.1177/0269215515604903)
22. Chen YW, Hunt MA, Campbell KL, Peill K, Reid WD. The effect of Tai Chi on four chronic conditions—cancer, osteoarthritis, heart failure and chronic obstructive pulmonary disease: a systematic review and meta-analyses. *Br J Sports Med*. 2016; 50: 397–407. doi: [10.1136/bjsports-2014-094388](https://doi.org/10.1136/bjsports-2014-094388) PMID: [26383108](https://pubmed.ncbi.nlm.nih.gov/26383108/)
23. Ng BH, Tsang HW, Ng BF, So CT. Traditional Chinese exercises for pulmonary rehabilitation: evidence from a systematic review. *J Cardiopulm Rehabil Prev*. 2014; 34: 367–377. doi: [10.1097/HCR.000000000000062](https://doi.org/10.1097/HCR.000000000000062) PMID: [24918351](https://pubmed.ncbi.nlm.nih.gov/24918351/)
24. Ding M, Zhang W, Li K, Chen X. Effectiveness of t'ai chi and qigong on chronic obstructive pulmonary disease: a systematic review and meta-analysis. *J Altern Complement Med*. 2014; 20: 79–86. doi: [10.1089/acm.2013.0087](https://doi.org/10.1089/acm.2013.0087) PMID: [23961940](https://pubmed.ncbi.nlm.nih.gov/23961940/)
25. Wu W, Liu X, Wang L, Wang Z, Hu J, Yan J. Effects of Tai Chi on exercise capacity and health-related quality of life in patients with chronic obstructive pulmonary disease: a systematic review and meta-analysis. *Int J Chron Obstruct Pulmon Dis*. 2014; 9: 1253–1263. doi: [10.2147/COPD.S70862](https://doi.org/10.2147/COPD.S70862) PMID: [25404855](https://pubmed.ncbi.nlm.nih.gov/25404855/)
26. Yan JH, Guo YZ, Yao HM, Pan L. Effects of Tai Chi in patients with chronic obstructive pulmonary disease: preliminary evidence. *PLoS One*. 2013; 8: e61806. doi: [10.1371/journal.pone.0061806](https://doi.org/10.1371/journal.pone.0061806) PMID: [23626732](https://pubmed.ncbi.nlm.nih.gov/23626732/)
27. Sharma M, Haider T. Tai Chi as an alternative and complementary therapy for patients with asthma and chronic obstructive pulmonary disease: A systematic review. *J Evid Based Complement Alternat Med*. 2013; 18: 209–215. doi: [10.1177/2156587213478174](https://doi.org/10.1177/2156587213478174)
28. Puhan MA, Chandra D, Mosenifar Z, Ries A, Make B, Hansel NN, et al. The minimal important difference of exercise tests in severe COPD. *Eur Respir J*. 2011; 37: 784–790. doi: [10.1183/09031936.00063810](https://doi.org/10.1183/09031936.00063810) PMID: [20693247](https://pubmed.ncbi.nlm.nih.gov/20693247/)
29. Tsang WW, Hui-Chan CW. Comparison of muscle torque, balance, and confidence in older tai chi and healthy adults. *Med Sci Sports Exerc*. 2005; 37: 280–289. doi: [10.1249/01.MSS.0000152735.06282.58](https://doi.org/10.1249/01.MSS.0000152735.06282.58) PMID: [15692325](https://pubmed.ncbi.nlm.nih.gov/15692325/)
30. Li JX, Xu DQ, Hong Y. Changes in muscle strength, endurance, and reaction of the lower extremities with Tai Chi intervention. *J Biomech*. 2009; 42: 967–971. doi: [10.1016/j.jbiomech.2009.03.001](https://doi.org/10.1016/j.jbiomech.2009.03.001) PMID: [19356761](https://pubmed.ncbi.nlm.nih.gov/19356761/)
31. Wu G, Liu W, Hitt J, Millon D. Spatial, temporal and muscle action patterns of Tai Chi gait. *J Electromyogr Kinesiol*. 2004; 14: 343–354. doi: [10.1016/j.jelekin.2003.09.002](https://doi.org/10.1016/j.jelekin.2003.09.002) PMID: [15094148](https://pubmed.ncbi.nlm.nih.gov/15094148/)
32. Christou EA, Yang Y, Rosengren KS. Taiji training improves knee extensor strength and force control in older adults. *J Gerontol a Biol Sci Med Sci*. 2003; 58: 763–766. PMID: [12902537](https://pubmed.ncbi.nlm.nih.gov/12902537/)
33. Xu D, Hong Y, Li J, Chan K. Effect of tai chi exercise on proprioception of ankle and knee joints in old people. *Br J Sports Med*. 2004; 38: 50–54. doi: [10.1136/bjism.2002.003335](https://doi.org/10.1136/bjism.2002.003335) PMID: [14751946](https://pubmed.ncbi.nlm.nih.gov/14751946/)

34. Wu G, Zhao F, Zhou X, Wei L. Improvement of isokinetic knee extensor strength and reduction of postural sway in the elderly from long-term Tai Chi exercise. *Arch Phys Med Rehabil.* 2002; 83: 1364–1369. doi: [10.1053/apmr.2002.34596](https://doi.org/10.1053/apmr.2002.34596) PMID: [12370869](https://pubmed.ncbi.nlm.nih.gov/12370869/)
35. Xu DQ, Li JX, Hong Y. Effect of regular Tai Chi and jogging exercise on neuromuscular reaction in older people. *Age Ageing.* 2005; 34: 439–444. doi: [10.1093/ageing/afi114](https://doi.org/10.1093/ageing/afi114) PMID: [15919758](https://pubmed.ncbi.nlm.nih.gov/15919758/)
36. Spruit MA, Polkey MI, Celli B, Edwards LD, Watkins ML, Pinto-Plata V, et al. Predicting outcomes from 6-minute walk distance in chronic obstructive pulmonary disease. *J Am Med Directors Assoc.* 2012; 13: 291–297. doi: [10.1016/j.jamda.2011.06.009](https://doi.org/10.1016/j.jamda.2011.06.009)
37. Du SD, Lianming WC. Effects of Taijiquan exercise on chronic obstructive pulmonary disease Endurance exercise in patients with disease and lung function. *Chin J Rehabil Med.* 2013; 28: 374–376.
38. Yeh GY, Wood MJ, Lorell BH, Stevenson LW, Eisenberg DM, Wayne PM, et al. Effects of tai chi mind-body movement therapy on functional status and exercise capacity in patients with chronic heart failure: a randomized controlled trial. *Am J Med.* 2004; 117: 541–658. doi: [10.1016/j.amjmed.2004.04.016](https://doi.org/10.1016/j.amjmed.2004.04.016) PMID: [15465501](https://pubmed.ncbi.nlm.nih.gov/15465501/)
39. Lan C, Lai JS, Chen SY, Wong MK. 12-month Tai Chi training in the elderly: its effect on health fitness. *Med Sci Sports Exerc.* 1998; 30: 345–351. doi: [10.1097/00005768-199803000-00003](https://doi.org/10.1097/00005768-199803000-00003) PMID: [9526879](https://pubmed.ncbi.nlm.nih.gov/9526879/)
40. Lan C, Lai JS, Chen SY, Wong MK. Tai Chi Chuan to improve muscular strength and endurance in elderly individuals: a pilot study. *Arch Phys Med Rehabil.* 2000; 81: 604–607. doi: [10.1053/mr.2000.3849](https://doi.org/10.1053/mr.2000.3849) PMID: [10807099](https://pubmed.ncbi.nlm.nih.gov/10807099/)
41. Langhorst J, Häuser W, Bernardy K, Lucius H, Settan M, Winkelmann A, et al. [Complementary and alternative therapies for fibromyalgia syndrome. Systematic review, meta-analysis and guideline]. *Schmerz.* 2012; 26: 311–317. doi: [10.1007/s00482-012-1178-9](https://doi.org/10.1007/s00482-012-1178-9) PMID: [22760464](https://pubmed.ncbi.nlm.nih.gov/22760464/)
42. Ding M. Tai Chi for stroke rehabilitation: a focused review. *Am J Phys Med Rehabil.* 2012; 91: 1091–1096. doi: [10.1097/PHM.0b013e31826edd21](https://doi.org/10.1097/PHM.0b013e31826edd21) PMID: [23064479](https://pubmed.ncbi.nlm.nih.gov/23064479/)
43. Mishra SI, Scherer RW, Geigle PM, Berlanstein DR, Topaloglu O, Gotay CC, et al. Exercise interventions on health-related quality of life for cancer survivors. *Cochrane Database Syst Rev.* 2012; 18: CD007566. doi: [10.1002/14651858.CD007566.pub2](https://doi.org/10.1002/14651858.CD007566.pub2)
44. Lacasse Y, Martin S, Lasserson TJ, Goldstein RS. Meta-analysis of respiratory rehabilitation in chronic obstructive pulmonary disease. *A Cochrane systematic review.* *Eura Medicophys.* 2007; 43: 475–485. doi: [10.1016/S0140-6736\(96\)04201-8](https://doi.org/10.1016/S0140-6736(96)04201-8) PMID: [18084170](https://pubmed.ncbi.nlm.nih.gov/18084170/)
45. Green RH, Singh SJ, Williams J, Morgan MD. A randomised controlled trial of four weeks versus seven weeks of pulmonary rehabilitation in chronic obstructive pulmonary disease. *Thorax.* 2001; 56: 143–145. doi: [10.1136/thorax.56.2.143](https://doi.org/10.1136/thorax.56.2.143) PMID: [11209104](https://pubmed.ncbi.nlm.nih.gov/11209104/)
46. Güell R, Casan P, Belda J, Sangenis M, Morante F, Guyatt GH, et al. Long-term effects of outpatient rehabilitation of COPD: a randomized trial. *Chest.* 2000; 117: 976–983. doi: [10.1378/chest.117.4.976](https://doi.org/10.1378/chest.117.4.976) PMID: [10767227](https://pubmed.ncbi.nlm.nih.gov/10767227/)
47. Cambach W, Chadwick-Straver RV, Wagenaar RC, van Keimpema AR, Kemper HC. The effects of a community-based pulmonary rehabilitation programme on exercise tolerance and quality of life: a randomized controlled trial. *Eur Respir J.* 1997; 10: 104–113. doi: [10.1183/09031936.97.10010104](https://doi.org/10.1183/09031936.97.10010104) PMID: [9032501](https://pubmed.ncbi.nlm.nih.gov/9032501/)
